# Supplementary material
Source: ML conference proceedings conference paper supplement (https://openaccess.thecvf.com/content/CVPR2021/html/Lv_Simultaneously_Localize_Segment_CVPR_2021_paper.html)
Supplement: Supplementary file 1 [file Lv_Simultaneously_Localize_Segment_CVPR_2021_supplemental.zip]

Archive with 1 entries (1 files):
- 00765-supp.pdf
